# Supplementary material for: Multimorbidity, clinical decision making and health care delivery in New Zealand Primary care: a qualitative study
Source: BMC Fam Pract. 2017 Apr 5;18:51. doi: 10.1186/s12875-017-0622-4 (PMC5382371; doi:10.1186/s12875-017-0622-4)
Supplement: Supplementary file 2 — COREQ-32 reporting checklist. An assessment of the study reporting against the domains of the COREQ-32 reporting checklist for interviews and focus groups. (PDF 208 kb) [file 12875_2017_622_MOESM2_ESM.pdf]

| Domain 1:                      | Research Team and Reflexivity        |                                                                                                                                                                                                                                                                                                                                                                                                                                                                                                                                                                                                                                         |
|--------------------------------|--------------------------------------|-----------------------------------------------------------------------------------------------------------------------------------------------------------------------------------------------------------------------------------------------------------------------------------------------------------------------------------------------------------------------------------------------------------------------------------------------------------------------------------------------------------------------------------------------------------------------------------------------------------------------------------------|
| Personal Characteristics       |                                      |                                                                                                                                                                                                                                                                                                                                                                                                                                                                                                                                                                                                                                         |
| 1.                             | Interviewer/facilitator              | The Assistant Research Fellow (Emma Tumilty) conducted the interviews                                                                                                                                                                                                                                                                                                                                                                                                                                                                                                                                                                   |
| 2.                             | Credentials                          | Prof. Tim Stokes – MA MBChB MPH PhD (qualitative research methods)<br>Dr Fiona Doolan-Noble – MPH PGDipPH RGN<br>Emma Tumilty – BA (Otago), PG Dip HealSci (Bioethics) (Otago), PhD (Bioethics – under examination) (Otago).<br>Prof. Robin Gauld - MA(Well) PhD(HK)                                                                                                                                                                                                                                                                                                                                                                    |
| 3.                             | Occupation                           | PhD candidate and Assistant Research Fellow                                                                                                                                                                                                                                                                                                                                                                                                                                                                                                                                                                                             |
| 4.                             | Gender                               | Two male-identifying and two female identifying researchers (interviewer, female-identifying)                                                                                                                                                                                                                                                                                                                                                                                                                                                                                                                                           |
| 5.                             | Experience and training              | Prof. Tim Stokes – experienced qualitative and mixed methods researcher with an associated publication track record of qualitative research studies<br>Dr Fiona Doolan-Noble – experienced qualitative and mixed methods researcher with an associated publication track record.<br>Emma Tumilty – previous experience undertaking qualitative interviews and analysing data in research projects prior to this study with an early career publication track record.<br>Prof. Robin Gauld – experienced health service and health policy researcher of international and national standing with an associated publication track record. |
| Relationship with participants |                                      |                                                                                                                                                                                                                                                                                                                                                                                                                                                                                                                                                                                                                                         |
| 6.                             | Relationship established             | The assistant research fellow had no relationships with participants prior to the study, while the broader research team had varying relationships with the primary care community at large. It was felt the interviewer should be seen as an unbiased enquirer rather than a person with a particular stance or opinion about the topic.                                                                                                                                                                                                                                                                                               |
| 7.                             | Participant knowledge of interviewer | The interviewer introduced herself to participants stating she was not a medical professional, etc. as well as describing the research team, its funding, the purpose of the project and answering any questions participants may have had about the project and those involved in it.                                                                                                                                                                                                                                                                                                                                                  |
| 8.                             | Interviewer characteristics          | The interviewer was not a medical professional, but aware of the medical system in New Zealand and had read the literature on multimorbidity prior                                                                                                                                                                                                                                                                                                                                                                                                                                                                                      |

|                       |                                       |                                                                                                                                                                                                                                                                                                                                                                                                           |
|-----------------------|---------------------------------------|-----------------------------------------------------------------------------------------------------------------------------------------------------------------------------------------------------------------------------------------------------------------------------------------------------------------------------------------------------------------------------------------------------------|
|                       |                                       | to the begin of the project. She had previously worked as an research assistant on other projects involving qualitative interviews.                                                                                                                                                                                                                                                                       |
| <b>Domain 2:</b>      | <b>Study Design</b>                   |                                                                                                                                                                                                                                                                                                                                                                                                           |
| Theoretical framework |                                       |                                                                                                                                                                                                                                                                                                                                                                                                           |
| 9.                    | Methodological orientation and theory | This project used an inductive method – data was analysed using the constant comparative approach.                                                                                                                                                                                                                                                                                                        |
| Participant Selection |                                       |                                                                                                                                                                                                                                                                                                                                                                                                           |
| 10.                   | Sampling                              | Purposive and snowball sampling was used to recruit general practitioners, nurses, and nurse practitioners in the Otago region                                                                                                                                                                                                                                                                            |
| 11.                   | Method of approach                    | Various methods of approach were used, group emails were sent via a third party, invitations were added to newsletters, emails were sent to practices, and then those taking part or responding were also asked to pass on information to others. Direct emails were sent to practice managers, etc.                                                                                                      |
| 12.                   | Sample size                           | 16                                                                                                                                                                                                                                                                                                                                                                                                        |
| 13.                   | Non-participation                     | There are 84 practices in the Otago region. A number of GPs and nurses did not respond to the invitation to participate, however no person responded directly to decline taking part, nor did anybody drop out once agreeing to take part.                                                                                                                                                                |
| Setting               |                                       |                                                                                                                                                                                                                                                                                                                                                                                                           |
| 14.                   | Setting of data collection            | Participants could determine whether the interview took place in their place of work or in a private meeting room arranged by the interviewer on the university campus. Participants were mixed in which of these options they chose.                                                                                                                                                                     |
| 15.                   | Presence of non-participants          | No                                                                                                                                                                                                                                                                                                                                                                                                        |
| 16.                   | Description of sample                 | The sample was nine females and seven males. Four of the sample were nursing professionals while twelve were general practitioners. Eleven participants identified as NZ European, while five listed other ethnicities (including: Asian, Other European, African, etc.). The majority of participants had 20+ years of experience (9), with 3 have more than 10 years, 3 more than 5, and 1 less than 5. |
| Data collection       |                                       |                                                                                                                                                                                                                                                                                                                                                                                                           |

|                                        |                                |                                                                                                                                                                                                               |
|----------------------------------------|--------------------------------|---------------------------------------------------------------------------------------------------------------------------------------------------------------------------------------------------------------|
| 17.                                    | Interview guide                | The interview guide was open, but listed a number of key questions and potential prompts. Interviews generally followed a similar approach although questions themselves varied depending on the participant. |
| 18.                                    | Repeat interviews              | No                                                                                                                                                                                                            |
| 19.                                    | Audio/visual recording         | All interviews were audio-recorded and later transcribed.                                                                                                                                                     |
| 20.                                    | Field notes                    | Yes, the interviewer wrote brief field notes after each interview regarding the nature of the interview and her perceptions of the participants responses, etc.                                               |
| 21.                                    | Duration                       | Interview times varied but were generally around 60mins (shortest 40mins, longest 85 mins)                                                                                                                    |
| 22.                                    | Data saturation                | Data saturation was discussed within the research team as the interviewer undertook interviews and open-coded them in nVivo                                                                                   |
| 23.                                    | Transcripts returned           | No                                                                                                                                                                                                            |
| <b>Domain 3: Analysis and Findings</b> |                                |                                                                                                                                                                                                               |
| <b>Data Analysis</b>                   |                                |                                                                                                                                                                                                               |
| 24.                                    | Number of data coders          | The interviewer coded the data and described codes and these were discussed with two other members of the interview team on a regular basis                                                                   |
| 25.                                    | Description of the coding tree | Codes had tags and description within the software except for where they were self-explanatory                                                                                                                |
| 26.                                    | Derivation of themes           | Themes were identified from the codes in team discussion                                                                                                                                                      |
| 27.                                    | Software                       | nVivo 11 was used to open code the data, describe codes and mark relationships                                                                                                                                |
| 28.                                    | Participant checking           | No                                                                                                                                                                                                            |
| <b>Reporting</b>                       |                                |                                                                                                                                                                                                               |
| 29.                                    | Quotations presented           | Yes quotations are presented and identified in a manner protecting participants confidentiality                                                                                                               |
| 30.                                    | Data and findings consistent   | Consistency between the data and the findings exists and is largely consistent with pre-existing literature in other locations (internationally).                                                             |
| 31.                                    | Clarity of major themes        | Yes, major themes are clearly identified                                                                                                                                                                      |
| 32.                                    | Clarity of minor themes        | Yes, minor themes are clearly identified and related to major themes.                                                                                                                                         |
